# Supplementary material for: c-Maf regulates pluripotency genes, proliferation/self-renewal, and lineage commitment in ROS-mediated senescence of human mesenchymal stem cells
Source: PubMed Central journal article supplement (PMC4742114; doi:10.18632/oncotarget.6178), 2015-10-19
Supplement: oncotarget-06-35404-s001.pdf [file oncotarget-06-35404-s001.pdf]

## **c-Maf regulates pluripotency genes, proliferation/self-renewal, and lineage commitment in ROS-mediated senescence of human mesenchymal stem cells**

### **Supplementary Material**

Supplementary Table S1: Lists of primers used for RT-PCR assay.

Supplementary Table S2: Lists of primers used for ChIP-PCR assay.

**Table S1. Lists of Primers Used for RT-PCR Assay**

| <b>Gene</b>                      | <b>Forward Primer</b>    | <b>Reverse Primer</b>       |
|----------------------------------|--------------------------|-----------------------------|
| <i>PPAR-<math>\gamma</math>2</i> | CGATGGGGATGCTCATAA       | CTTTTGGCATACTCTGTGAT        |
| <i>Lep</i>                       | TTCACACACGCAGTCAGT CTCC  | GGCATACTGGTGAGGATCTG        |
| <i>RUNX2</i>                     | ACCCAGAAGGCACAGACAG      | TGGTAGAGTGGATGGACGG         |
| <i>ALP</i>                       | AGCTGAACAGGAACAACGTGA    | CTTCATGGTGCCCGTGGTC         |
| <i>SOD2</i>                      | TGGACAAACCTCAGCCCTAAC    | AAACCAAGCCAACCCCAACC        |
| <i>CAT</i>                       | TACTCAGGTGCGGGCATTCC     | TGATGAGCGGGTTACACGG         |
| <i>PRDX6</i>                     | ACCTCCGCTACACACCCCC      | AGAGTGCTGATGTATGAATGG       |
| <i>c-Maf</i>                     | GACGACCGCTTCTCCGAC       | CGCTGCTCACCAACTTCTC         |
| <i>c-Myc</i>                     | TGCCTCAAATTGGACTTTGG     | GATTGAAATTCTGTGTAAGTGC      |
| <i>p16<sup>INK4a</sup></i>       | TGCCTTCCCCCACTACCG       | AACCCCCCTGAGCTTCCC          |
| <i>p15<sup>INK4b</sup></i>       | CGTTAAGTTTACGGCCAACG     | GGTGAGAGTGGCAGGGTCT         |
| <i>CCND2</i>                     | ATTGGCATGTCTGGTTCACA     | GAACGCCAGATACCAGAAGC        |
| <i>Arf</i>                       | TCTTGGTGACCCTCCGGAT      | GGCAGTTGTGGCCCTGTAG         |
| <i>p53</i>                       | TGTGGGGAGGAGGATGGG       | AGGGAGAGGGAACAAGCAC         |
| <i>p21</i>                       | ATGGGGCTGGGAGTAGTTG      | AGACACAGAACAGTACAGGG        |
| <i>p27</i>                       | TTGTTAGATAGCTGCATGTGG    | TCAAAACTCCCAAGCACCTC        |
| <i>Sox2</i>                      | TACCTCTTCCCTCCCACTCCAT   | GGTAGTGCTGGGACATGTGA        |
| <i>Oct4</i>                      | GTGGAGAGCAACTCCGATG      | TGCAGAGCTTTGATGTCTCG        |
| <i>Nanog</i>                     | GCTTGCCTTGCTTTGAAGCA     | TTCTTGACCGGGACCTTGTC        |
| <i>Klf4</i>                      | ACGATCGTGGCCCCGAAAAGGACC | TGATTGTAGTGCTTTCTGGCTGGGCTC |
| <i><math>\beta</math>-actin</i>  | GGCACCCAGCACAATGAAG      | TGCGGTGGACGATGGAGG          |

**Table S2. Lists of Primers Used for CHIP-PCR Assay**

| <b>Genomic region</b>  | <b>Forward Primer</b>    | <b>Reverse Primer</b>    |
|------------------------|--------------------------|--------------------------|
| <i>Sox2</i> : TM1+TM2  | CCATCTCATCCTCCTCTAAC     | CAAAGGGGCTCAAGGCCTG      |
| <i>Sox2</i> : D        | AAGAACAGAGCAAGTTACGTG    | CTCTCCTCTCTTACCTTACAG    |
| <i>Oct4</i> : TM       | CCTCCTGTTCCGAAGCATG      | TTCAATACCTGCCACAGGTC     |
| <i>Oct4</i> : D        | TGGGACCAGTTCTGATGACTC    | CTGTTATGCCTGAAGGGTAG     |
| <i>Nanog</i> : TM      | TCGAGTCTTTGCATTGTGAAC    | CTCTTAGCAAATCCCGATTATG   |
| <i>Nanog</i> : D       | GCCTGGCCAAAGGGTAGG       | ACCAAATGAAGATGGGAGAC     |
| <i>Klf4</i> : TM1      | GGTTGAACTCCTCGAGGTC      | CAGAGTCGGACGCCCTTG       |
| <i>Klf4</i> : TM2      | ATGGGTGCAGCACACCAAC      | CCTCATCTCCTTGTGAACTC     |
| <i>Klf4</i> : D        | CCTAACCTCTAAAGTCTACAC    | ACTGGATCCCTTCCTTACAC     |
| <i>c-Myc</i> : TM1     | GTGCACTTTCCTACTAGTATTCAG | TCGATTCTGATCAAAGAAGAGGAG |
| <i>c-Myc</i> : TM2     | AACACTTGAACGCTGAGCTG     | CTCCACCACCTCCAAAAGAG     |
| <i>c-Myc</i> : TM3     | AGAAGCCCAACCCACTCAG      | CATCTTTGGTCTTTACCTC      |
| <i>c-Myc</i> : D       | CTACAAGCATAAGCCACCAC     | GAATAGACATTTGCTGGGTTG    |
| <i>CCND2</i> : TM1     | CCAGCCAGCTTGCGTCAC       | AGAAGGGAGGCGAGGATTG      |
| <i>CCND2</i> : TM2     | ACTTCAAAGCCAGAGCACAG     | AAATGCACTCCACCTAGCAC     |
| <i>CCND2</i> : CM1     | TTTTAACACATGGCTGGAGTG    | GCTCGCCATCGAATCCAATC     |
| <i>CCND2</i> : CM2+CM3 | TGAGCCGACCGCGGAATC       | GTGTACAAAGCCTGGAGGTG     |
| <i>CCND2</i> : D       | TTCACGACTCTCAAGTGGAG     | ATTTCTTTAGGTTATGGTCCTG   |
